# Supplementary material for: A Biochemical Analysis of Patients with COVID-19 Infection
Source: Biochem Res Int. 2021 Oct 22;2021:1383830. doi: 10.1155/2021/1383830 (PMC8542065; doi:10.1155/2021/1383830)
Supplement: Supplementary Materials — Overview of the clinical information, age, gender, and biochemical parameters for the 100 participants in the study. [file 1383830.f1.txt]

	Ca	Na	K	Cl	Mg	P	urea	Crea.	uric acid	chol.	Tri	HDL	GOT	GPT	ALK.	TSB	Diabetic	Blood pressure	Smoking	Cancer	Gender	Age
	mmol/L	mmol/L	mmol/L	mmol/L	mg/dl	mg/dl	mg/dl	mg/dl	mg/dl	mg/dl	mg/dl	mg/dl	U/I	U/I	U/I	mg/dl
Patient No.	Normal range (2.1-2.55)	Normal range (136-149)	Normal range (3.8-5)	Normal range (98-106)	Normal range (1.8-2.4)	Normal range (2.6-4.4)	Normal range (20-45)	Normal range (0.6-1.4)	Normal range (2.5-7.0)	Normal range (150-200)	Normal range (65-180)	Normal range (35-70)	Normal range (up to 38)	Normal range (up to 44)	Normal range (104- 338)	Normal range (0-1-1.2)
1	1.97	139	4.1	99	1.9	3.2	29	0.7	4.8	178	134	32	26	32	178	0.3	NO	NO	NO	NO	F	35
2	2.16	141	4	100	1.9	2.5	28	0.6	5.2	160	125	36	45	43	206	0.4	NO	NO	NO	NO	F	19
3	2.42	138	3.9	99	1.8	2.6	30	0.8	4.4	210	166	31	34	26	167	0.3	NO	NO	NO	NO	M	45
4	2.46	144	3.9	102	2	2.7	29	0.7	4.2	156	156	43	32	31	156	0.2	Yas	NO	NO	NO	F	29
5	2.33	137	4	101	1.8	2.8	33	0.8	4.9	188	145	45	23	32	166	0.2	NO	NO	NO	NO	F	33
6	2.4	138	3.8	99	2.1	3.3	32	0.8	3.9	149	234	32	19	23	145	0.3	NO	NO	NO	NO	F	20
7	2.25	140	4.1	98	2	2.6	41	1.3	5.6	154	198	45	40	46	345	0.7	NO	NO	NO	NO	M	41
8	2.3	143	4.4	99	1.2	3.3	37	1.2	5.1	177	198	47	33	29	189	0.6	NO	NO	NO	NO	F	38
9	2.43	141	4.1	99	1.9	3.5	27	0.6	3.8	182	167	51	24	27	156	0.3	NO	Yes	NO	NO	M	19
10	2.5	144	4.2	98	1.9	3.2	38	1.4	4.6	163	156	46	28	37	176	0.4	yes	NO	NO	NO	F	44
11	2.35	145	4	100	1.8	2.9	36	1.2	4.8	148	167	39	19	26	145	0.3	NO	NO	NO	NO	M	39
12	2.39	143	4.3	99	2	4.2	29	0.7	3.8	198	233	37	21	31	148	0.2	NO	NO	NO	NO	F	19
13	2.42	144	3.9	98	2.1	3.6	29	0.7	3.7	202	256	35	34	41	198	0.5	NO	Yes	NO	NO	F	18
14	2.37	148	4	101	1.9	3.2	28	0.6	4	139	167	47	45	54	356	0.8	NO	NO	NO	NO	F	23
15	2.32	141	3.8	102	2.1	2.5	27	0.6	3.8	168	198	48	44	54	398	0.8	NO	NO	NO	NO	M	27
16	2.2	142	4.1	99	1.9	2.6	30	0.8	4.1	190	216	36	38	35	189	0.7	yas	No	NO	NO	F	22
17	2.2	139	4	98	1.8	2.7	30	0.9	4.5	175	198	51	37	35	169	0.4	NO	NO	NO	NO	F	30
18	2.19	137	3.9	99	2	2.8	35	1	5.5	167	189	44	25	27	144	0.3	NO	NO	NO	NO	M	52
19	2.31	139	3.9	100	2.2	3.3	29	0.6	3.7	185	215	33	27	37	154	0.4	NO	NO	NO	NO	F	42
20	2.5	141	4	101	2.1	2.6	29	0.8	4.2	172	189	46	29	40	189	0.7	NO	Yes	Yes	NO	M	34
21	2.1	138	3.8	102	1.9	3.3	35	1	5.4	167	177	47	39	43	188	0.5	NO	NO	NO	NO	F	62
22	2	144	4.1	103	1.9	3.5	44	1.3	5.7	144	155	51	47	54	349	0.8	NO	NO	NO	Yes	M	23
23	2.29	137	4.4	102	1.8	3.2	29	0.8	4	136	145	40	78	86	412	0.9	NO	NO	Yes	NO	M	36
24	2.52	138	4.1	101	2	2.9	28	0.6	3.6	184	199	50	45	54	377	1	yas	NO	NO	NO	F	51
25	2.37	140	4.2	99	1.8	4.2	30	0.8	4.2	156	178	47	37	38	190	0.6	NO	NO	NO	Yes	F	28
26	1.97	143	4	99	2.1	3.6	45	1.6	5.6	165	197	44	45	44	336	0.9	NO	Yes	NO	NO	M	74
27	2.16	141	4.3	100	2	3.2	49	1.7	5.9	176	195	51	67	81	367	1.1	yas	NO	NO	NO	F	63
28	2.42	144	3.9	99	1.2	2.5	30	0.8	4.4	157	176	45	24	26	144	0.3	NO	NO	Yes	NO	M	22
29	2.46	145	4	102	1.9	2.6	40	1.3	6	134	154	42	26	31	145	0.3	yas	NO	NO	NO	F	54
30	2.33	143	3.8	101	1.9	2.7	44	1.4	5.7	155	188	39	17	23	136	0.2	NO	NO	NO	NO	M	37
31	2.4	144	4.1	99	1.8	2.8	30	0.8	4.3	146	165	36	19	22	127	0.2	NO	Yes	NO	NO	F	25
32	2.25	148	4	98	2	3.3	31	0.9	4.4	181	241	40	34	28	134	0.3	NO	NO	NO	NO	F	17
33	2.3	141	3.9	99	2.1	2.6	28	0.7	3.8	155	186	45	22	19	122	0.3	NO	NO	NO	Yes	F	20
34	2.43	142	3.9	99	1.9	3.3	29	0.8	4.6	184	216	54	37	35	149	0.4	NO	NO	NO	NO	M	55
35	2.5	139	4	98	2.1	3.5	32	0.9	5	194	216	34	35	38	178	0.5	yas	NO	NO	NO	M	46
36	2.35	137	3.8	100	1.9	3.2	27	0.6	3.5	176	187	44	27	29	138	0.3	NO	NO	NO	NO	F	36
37	2.39	139	4.1	99	1.8	2.9	33	0.9	4.8	155	167	38	44	49	352	0.7	NO	NO	NO	NO	M	34
38	2.42	141	4.4	98	2	4.2	34	0.9	5.2	172	190	60	28	27	134	0.4	yas	NO	NO	NO	F	18
39	2.37	138	4.1	101	2.2	3.6	41	1.2	5.9	146	176	41	19	28	113	0.3	NO	NO	NO	NO	F	43
40	2.32	144	4.2	102	2.1	3.2	35	1	6.1	186	209	38	36	39	177	0.5	NO	NO	NO	NO	M	55
41	2.2	137	4	99	1.9	2.5	29	0.7	3.7	167	178	51	41	44	190	0.9	yas	NO	NO	NO	M	26
42	2.2	138	4.3	98	1.9	2.6	38	1.4	5.9	154	189	44	23	21	123	0.3	NO	NO	Yes	NO	M	65
43	2.19	140	3.9	99	1.8	2.7	28	0.6	3.5	187	216	43	24	23	127	0.3	yas	NO	NO	NO	F	26
44	2.31	143	4	100	2	2.8	36	1.1	4.7	213	256	34	16	27	161	0.3	NO	NO	Yes	NO	F	44
45	2.5	141	3.8	101	1.8	3.3	29	0.7	4.4	167	178	53	25	34	166	0.4	NO	NO	NO	NO	F	34
46	2.1	144	4.1	102	2.1	2.6	28	0.7	3.7	223	267	43	56	68	423	0.8	NO	NO	Yes	NO	M	22
47	2	145	4	103	2	3.3	44	1.5	6.2	234	255	41	36	43	412	0.9	yas	NO	Yes	NO	M	31
48	2.29	143	3.9	102	1.2	3.5	30	0.8	4.9	145	198	42	31	28	185	0.4	NO	NO	NO	NO	F	33
49	2.52	144	3.9	101	1.9	3.2	51	1.8	6.6	166	189	34	25	31	136	0.5	NO	Yes	Yes	NO	M	48
50	2.37	148	4	99	1.9	2.9	29	0.7	4	199	231	43	22	26	124	0.4	NO	NO	NO	NO	F	29
51	1.97	141	3.8	99	1.8	4.2	34	0.9	4.3	211	223	32	16	19	123	0.3	Yas	NO	Yes	NO	M	46
52	2.16	142	4.1	100	2	3.6	39	1.5	5.8	225	245	37	43	55	369	0.8	NO	NO	NO	NO	F	70
53	2.42	139	4.4	99	2.1	3.2	37	1.3	5.4	157	156	34	26	28	116	0.4	NO	NO	NO	Yes	M	24
54	2.46	137	4.1	102	1.9	2.5	29	0.8	4.6	145	175	38	53	68	390	0.7	NO	NO	Yes	NO	M	38
55	2.33	139	4.2	101	2.1	2.6	27	0.6	3.9	187	190	42	23	19	128	0.3	Yes	NO	NO	NO	F	52
56	2.4	141	4	99	1.9	2.7	26	0.6	3.7	162	134	32	21	21	118	0.3	NO	NO	NO	NO	F	36
57	2.25	138	4.3	98	1.8	2.8	33	1	5.1	161	145	36	16	25	143	0.4	NO	NO	Yes	NO	M	66
58	2.3	144	3.9	99	2	3.3	52	1.7	6.4	209	246	35	18	26	136	0.3	Yes	NO	NO	NO	F	64
59	2.43	137	4	99	2.2	2.6	36	0.9	4.8	172	147	44	15	21	128	0.3	NO	NO	Yes	NO	M	17
60	2.5	138	3.8	98	2.1	3.3	26	0.7	4	191	210	36	34	38	168	0.6	NO	NO	NO	NO	F	23
61	2.35	140	4.1	100	1.9	3.5	29	0.8	4.7	226	233	29	26	33	156	0.5	NO	NO	Yes	NO	M	45
62	2.39	143	4	99	1.9	3.2	30	0.7	4.1	179	189	34	56	71	355	0.8	yas	NO	NO	NO	F	30
63	2.42	141	3.9	98	1.8	2.9	33	0.9	5.2	156	167	45	67	76	423	0.9	NO	NO	NO	NO	F	27
64	2.37	144	3.9	101	2	4.2	32	0.8	4.8	188	198	38	30	33	187	0.7	NO	NO	Yes	NO	M	28
65	2.32	145	4	102	1.8	3.6	31	0.9	5.7	159	145	50	33	36	197	0.5	NO	NO	NO	Yes	M	37
66	2.2	143	3.8	99	2.1	3.2	35	1.2	6.6	190	189	46	24	28	127	0.4	Yes	NO	NO	NO	F	49
67	2.2	144	4.1	98	2	2.5	29	0.7	4.9	209	215	33	26	32	123	0.3	NO	NO	Yes	NO	M	26
68	2.19	148	4.4	99	1.2	2.6	29	0.7	4.3	188	190	43	35	34	154	0.5	NO	NO	NO	NO	F	24
69	2.31	141	4.1	100	1.9	2.7	28	0.6	3.8	167	165	42	37	40	198	0.8	Yes	NO	Yes	NO	M	56
70	2.5	142	4.2	101	1.9	2.8	27	0.6	3.6	156	124	38	21	23	121	0.3	NO	NO	Yes	NO	M	45
71	2.1	139	4	102	1.8	3.3	31	0.9	5.3	211	212	48	22	26	122	0.3	NO	NO	NO	NO	M	36
72	2	137	4.3	103	2	2.6	30	0.8	4.7	241	312	51	39	36	178	0.4	Yes	NO	NO	NO	F	21
73	2.29	139	3.9	102	2.1	3.3	29	0.7	04-Jan	154	133	34	34	31	151	0.3	NO	NO	NO	NO	F	28
74	2.52	141	4	101	1.9	3.5	40	1.4	Jan-00	176	127	36	33	30	154	0.3	NO	NO	Yes	NO	M	52
75	2.37	138	3.8	99	2.1	3.2	47	1.6	6.4	133	123	36	36	32	145	0.5	NO	NO	NO	NO	F	46
76	1.97	144	4.1	99	1.9	2.9	28	0.8	4.4	184	199	44	28	35	147	0.4	NO	Yes	Yes	NO	M	37
77	2.16	137	4	100	1.8	4.2	39	1.3	5.4	178	188	46	19	21	114	0.2	NO	NO	NO	NO	F	57
78	2.42	138	3.9	99	2	3.6	38	1.4	5.8	167	156	52	28	33	123	0.3	NO	NO	Yes	NO	M	60
79	2.46	140	3.9	102	2.2	3.2	27	0.6	3.5	198	200	54	37	42	165	0.4	Yes	NO	NO	Yes	M	21
80	2.33	143	4	101	2.1	2.5	43	1.5	6.2	195	198	39	44	48	214	0.7	NO	Yes	Yes	NO	M	48
81	2.4	141	3.8	99	1.9	2.6	36	1	6	155	112	40	35	36	177	0.6	NO	NO	NO	NO	F	40
82	2.25	144	4.1	98	1.9	2.7	29	0.7	4.8	210	243	38	27	23	121	0.3	NO	NO	Yes	NO	M	26
83	2.3	145	4.4	99	1.8	2.8	31	0.8	4.4	145	145	34	24	19	126	0.3	NO	NO	Yes	NO	M	41
84	2.43	143	4.1	99	2	3.3	32	0.9	4.9	178	167	41	23	15	144	0.4	NO	NO	NO	NO	F	67
85	2.5	144	4.2	98	1.8	2.6	29	0.7	5.1	155	122	35	17	18	155	0.5	NO	NO	NO	NO	F	38
86	2.35	148	4	100	2.1	3.3	43	1.5	6.3	182	190	44	37	38	156	0.5	NO	Yes	NO	NO	F	23
87	2.39	141	4.3	99	2	3.5	33	0.9	5.5	196	197	45	41	47	213	0.7	NO	NO	Yes	NO	M	25
88	2.42	142	3.9	98	1.2	3.2	29	0.8	5.8	228	265	35	40	45	245	0.9	Yes	Yes	NO	NO	F	32
89	2.37	139	4	101	1.9	2.9	29	0.7	4.9	128	133	36	69	82	434	1.1	NO	NO	NO	NO	F	29
90	2.32	137	3.8	102	1.9	4.2	31	0.9	5.9	168	178	38	71	93	390	1.2	NO	NO	NO	NO	F	19
91	2.2	139	4.1	99	1.8	3.6	30	0.8	4.5	190	176	48	23	25	134	0.3	NO	NO	Yes	NO	F	25
92	2.2	141	4	98	2	3.2	26	0.6	4.1	205	234	53	27	31	143	0.4	NO	Yes	NO	NO	F	22
93	2.19	138	3.9	99	2.1	2.5	30	0.8	5.2	213	213	29	28	24	134	0.2	Yes	Yes	NO	NO	M	16
94	2.31	144	3.9	100	1.9	2.6	36	1.2	5.9	189	199	35	16	17	114	0.3	NO	NO	NO	NO	F	31
95	2.5	137	4	101	2.1	2.7	29	0.7	3.8	179	189	34	15	21	115	0.3	NO	NO	Yes	NO	M	40
96	2.1	138	3.8	102	1.9	2.8	28	0.6	3.9	135	134	36	24	26	134	0.5	Yes	NO	NO	NO	F	41
97	2	140	4.1	103	1.8	3.3	38	0.8	4.7	150	156	32	33	34	157	0.4	NO	Yes	NO	NO	M	24
98	2.29	143	4.4	102	2	2.6	40	1.3	6.1	182	187	48	22	28	156	0.6	NO	NO	Yes	NO	M	55
99	2.52	141	4.1	101	2.2	3.3	55	1.7	6.5	173	156	45	31	34	176	0.6	NO	NO	NO	NO	F	59
100	2.37	144	4.2	99	2.1	3.5	37	1.3	5.8	197	145	38	37	39	186	0.5	Yes	Yes	NO	NO	M	41
